# Supplementary material
Source: publisher figshare collection journal article supplement (https://tandf.figshare.com/ndownloader/files/21923661)
Supplement: Supplementary file 1 [file 21923661]

Fig. S1. Schematic dragram of the EBAB system used in EBAB-fed-batch fermentations.
